# Supplementary material for: A Non-enzymatic Electrochemical Sensor of Cu@Co-MOF Composite for Glucose Detection with High Sensitivity and Selectivity
Source: Preprints.org preprint supplement (doi:10.20944/preprints202208.0271.v1), 2022-08-16
Supplement: Supplementary file 1 [file supplementary]

## Supporting Information

### A sensitive and selective non-enzymatic electrochemical sensor of Cu@Co-MOF composite for glucose detection

Zhen-zhen Ma, Bing Liu, Huang Jiao\*, Ling Xu\*

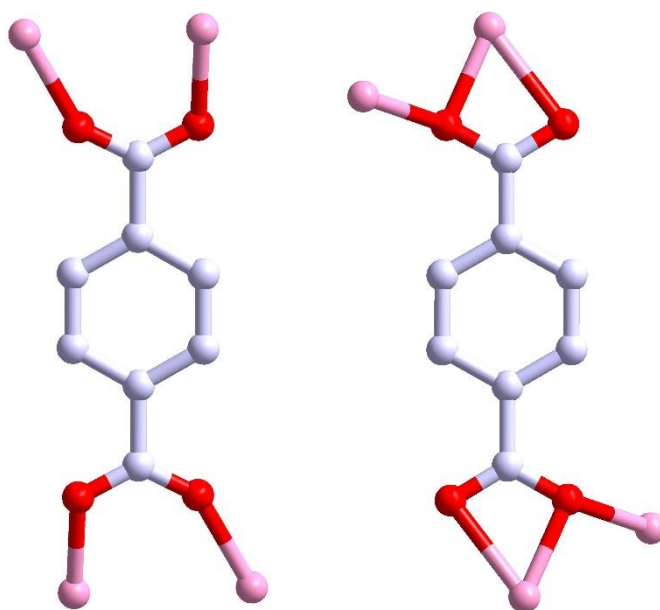

**Figure S1.** The coordination modes of BDC<sup>2-</sup> ligand in Co-MOF.

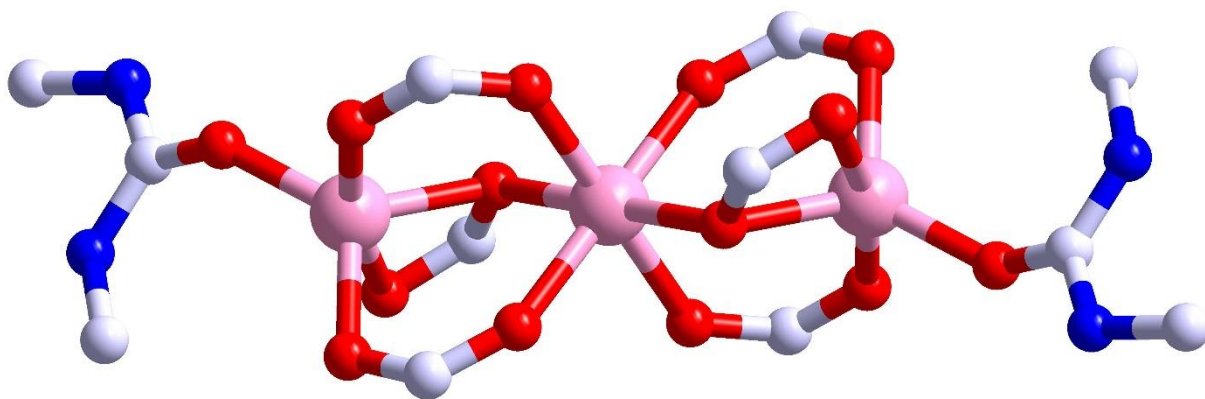

**Figure S2.** The structure motif of the linear trinuclear [Co<sub>3</sub>(COO)<sub>6</sub>(DMU)<sub>2</sub>] SBU.

---

\* Corresponding authors: [xuling@snnu.edu.cn](mailto:xuling@snnu.edu.cn) (L. Xu); [huangjiao@snnu.edu.cn](mailto:huangjiao@snnu.edu.cn) (H. Jiao).

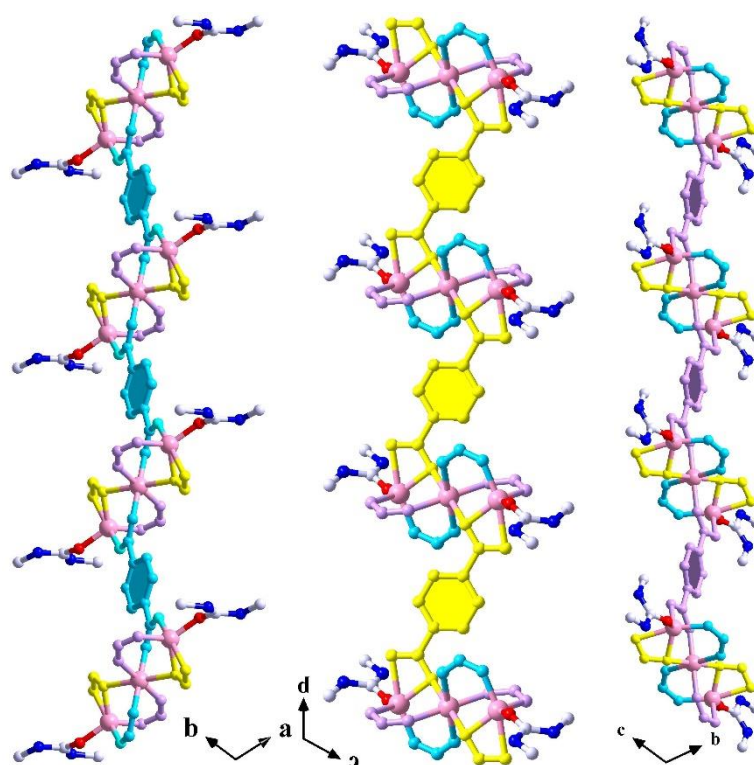

**Figure S3.**  $[\text{Co}_3(\text{COO})_6(\text{DMU})_2]$  SBUs connect  $\text{BDC}^{2-}$  ligands with O11/O12 (a), O21/O22 (b), and O31/O32 (c) into three 1D chains along the  $[110]$ ,  $b$ - and  $[011]$  directions respectively.

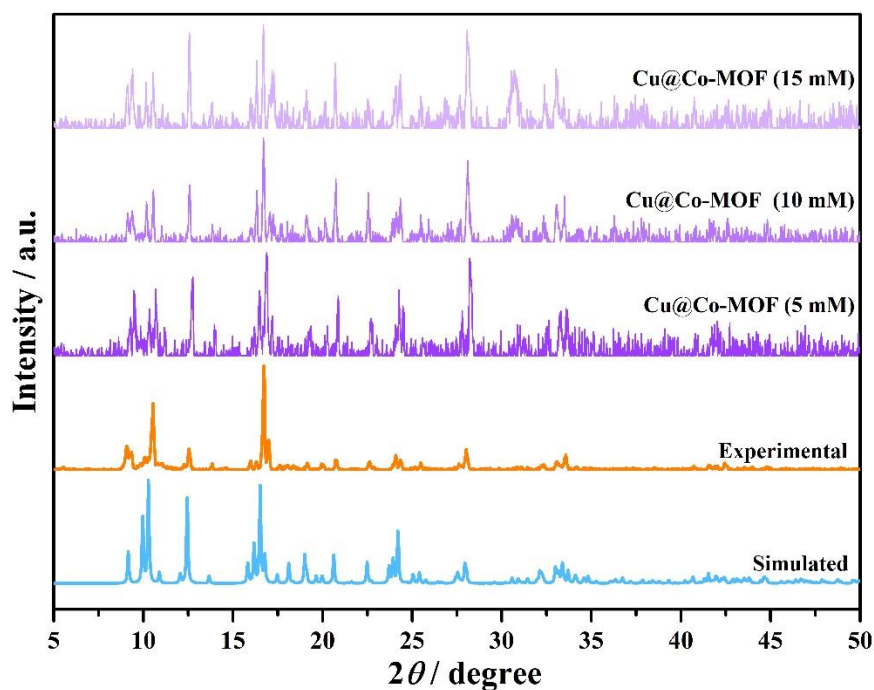

**Figure S4.** The experimental XRD patterns of Co-MOF and Cu@Co-MOF compared to the simulated Co-MOF.

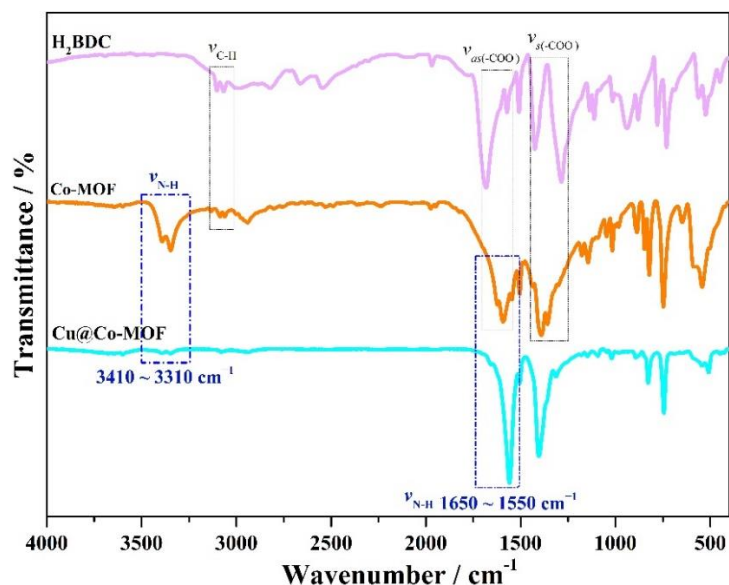

Figure S5. FT-IR spectra of Co-MOF, Cu@Co-MOF and free H<sub>2</sub>BDC ligand.

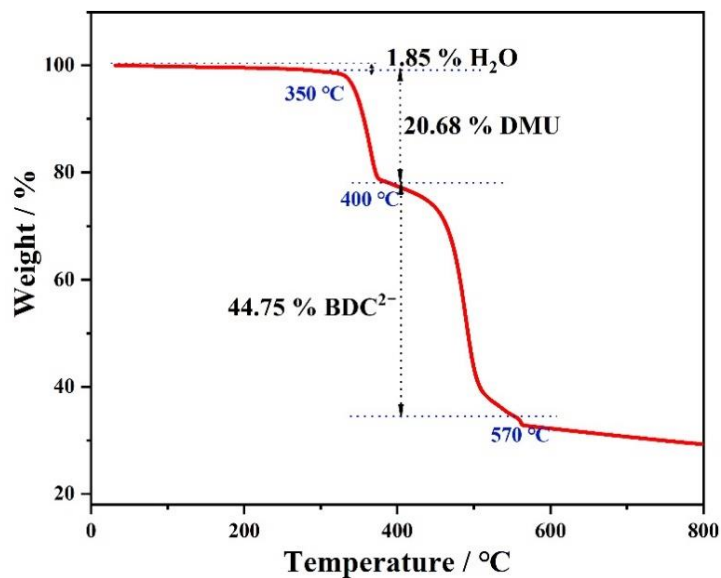

Figure S6. TGA curve of Co-MOF.

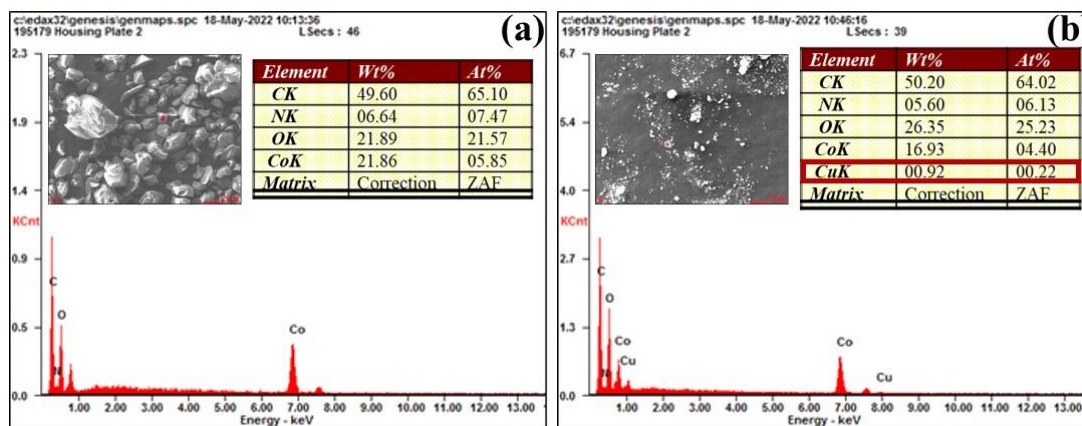

Figure S7. EDS of Co-MOF (a) and Cu@Co-MOF (b).
